# Supplementary material
Source: MDPI journal article supplement (https://www.mdpi.com/search?q=molecules-18-15600)

## Supplementary Materials for

### *In Vitro* Evaluation of Novel Inhibitors Against the NS2B-NS3 Protease of Dengue Fever Virus Type 4

**Table S1.** Free binding energy and inhibition activities of the identified compounds against recombinant NS2B-NS3<sup>pro</sup>.

| Compound No. | Chemdiv ID <sup>a</sup> | Chemical Name                                                                                                                                                                   | Free Binding Energy (kcal. mol <sup>-1</sup> ) | Inhibition Activity <sup>b</sup> (%) |
|--------------|-------------------------|---------------------------------------------------------------------------------------------------------------------------------------------------------------------------------|------------------------------------------------|--------------------------------------|
| 1            | 2036-0800               | 4-(2,6-bis(3-hydroxyphenyl)-1,3,5,7-tetraoxo-1,2,3,5,6,7-hexahydropyrrolo[3,4-f]isoindole-4-carbonyl)benzoic acid                                                               | -12.14                                         | 15.05                                |
| 2            | 6049-2540               | 5-((4-chloro-5-methyl-3-nitro-1H-pyrazol-1-yl)methyl)-N-(1-(2-(diethylamino)ethyl)-1H-benzo[d]imidazol-2-yl)furan-2-carboxamide                                                 | -13.23                                         | 95.23                                |
| 3            | C684-0059               | 1-(4-(2,5-dimethylphenyl)piperazin-1-yl)-4-(10-methylbis([1,2,4]triazolo)[4,3-a:1',5'-c]quinazolin-3-yl)butan-1-one                                                             | -11.34                                         | 2.61                                 |
| 4            | 8007-4601               | 2,6-bis(1,3-dioxo-2-phenylisoindolin-5-yl)pyrrolo[3,4-f]isoindole-1,3,5,7(2H,6H)-tetraone                                                                                       | -10.95                                         | 4.64                                 |
| 5            | E881-0223               | 3-((8-benzoyl-1-methyl-[1,2,4]triazolo[4,3-a]quinoxalin-4-yl)amino)benzoic acid                                                                                                 | -10.32                                         | 58.83                                |
| 6            | K785-0146               | (5,7-dimethyl-6-(3-methylbenzyl)pyrazolo[1,5-a]pyrimidin-3-yl)(4-(2,5-dimethylphenyl)piperazin-1-yl)methanone                                                                   | -11.22                                         | 8.61                                 |
| 7            | 2688-0025               | N-(2-benzoyl-4-bromophenyl)-3-((6-bromo-4-phenylquinazolin-2-yl)amino)benzamide                                                                                                 | -10.68                                         | 21.31                                |
| 8            | E626-0966               | N-(3-(piperidin-1-yl)propyl)-1-(6-(p-tolyl)imidazo[2,1-b][1,3,4]thiadiazol-2-yl)piperidine-3-carboxamide                                                                        | -12.40                                         | 33.48                                |
| 9            | K979-0542               | N-cycloheptyl-3-(3-methoxyphenyl)-4-oxo-3,4-dihydrophthalazine-1-carboxamide                                                                                                    | -9.87                                          | 23.33                                |
| 10           | 8009-4947               | [1,1'-biphenyl]-4,4'-diylbis((3-amino-4,5,6-trimethylthieno[2,3-b]pyridin-2-yl)methanone)                                                                                       | -12.55                                         | 7.59                                 |
| 11           | D008-0060               | 4-((4aR,5R,5aR,8aR,9S)-10-(4-(tert-butyl)phenyl)-2,6,8-trioxo-2,3,4a,5,5a,6,8a,9,9a,10-decahydro-5,9-methanothiazolo[5',4':5,6]thiopyrano[2,3-f]isoindol-7(8H)-yl)butanoic acid | -10.77                                         | 12.46                                |
| 12           | 3011-0208               | 2-(5-(4-fluorophenyl)-3-(thiophen-2-yl)-4,5-dihydro-1H-pyrazol-1-yl)-4-(4-(piperidin-1-ylsulfonyl)phenyl)thiazole                                                               | -11.27                                         | 85.17                                |
| 13           | 8011-5845               | 5-(5,6-dibromo-1,3-dioxohexahydro-1H-4,7-methanoisoindol-2(3H)-yl)-2-morpholinobenzoic acid                                                                                     | -10.79                                         | 5.55                                 |
| 14           | G642-2349               | 4-(3-acetyl-5-(2-phenylquinolin-4-yl)-2,3-dihydro-1,3,4-oxadiazol-2-yl)benzoic acid                                                                                             | -10.42                                         | 98.15                                |

Table S1. Cont.

| Compound No. | Chemdiv ID <sup>a</sup> | Chemical Name                                                                                                                                                | Free Binding Energy (kcal. mol <sup>-1</sup> ) | Inhibition Activity <sup>b</sup> (%) |
|--------------|-------------------------|--------------------------------------------------------------------------------------------------------------------------------------------------------------|------------------------------------------------|--------------------------------------|
| 15           | G608-0283               | 2-(4-((5-methyl-2-(m-tolyl)-[1,2,4]triazolo[1,5-a]pyrimidin-7-yl)amino)phenyl)acetic acid                                                                    | -11.32                                         | 17.36                                |
| 16           | 8004-3490               | 2-(1-isobutyl-5,5-dimethyl-3-(naphthalen-1-yl)-2-oxoimidazolidin-4-yl)-4-(naphthalen-1-yl)-1,2,4-oxadiazolidine-3,5-dione                                    | -12.07                                         | 33.28                                |
| 17           | D052-0041               | 3-(((1-methyl-1H-tetrazol-5-yl)thio)methyl)-7-(2-(5-methyl-4-nitro-1H-pyrazol-1-yl)acetamido)-8-oxo-5-thia-1-azabicyclo[4.2.0]oct-2-ene-2-carboxylic acid    | -13.23                                         | 23.01                                |
| 18           | E017-0021               | 1-(5-(4-(4-(5-chloro-2-methylphenyl)piperazine-1-carbonyl)piperidin-1-yl)-1,3,4-thiadiazol-2-yl)pyrrolidin-2-one                                             | -10.26                                         | 0.15                                 |
| 19           | D385-0151               | methyl 2-((1-(4,6-di(piperidin-1-yl)-1,3,5-triazin-2-yl)-1H-1,2,4-triazol-3-yl)thio)acetate                                                                  | -10.96                                         | 10.28                                |
| 20           | K953-0293               | N-(4-((2-(benzo[d][1,3]dioxol-5-yl)-1,3-dioxoisindolin-5-yl)oxy)phenyl)-1-oxo-4-phenyl-1H-isochromene-3-carboxamide                                          | -12.94                                         | 28.87                                |
| 21           | 8005-2734               | 2-(3-(2-(3,5-diphenyl-4,5-dihydro-1H-pyrazol-1-yl)thiazol-4-yl)phenyl)isoindoline-1,3-dione                                                                  | -11.11                                         | 21.27                                |
| 22           | K286-0036               | 5-[[[(7-chloro-4-oxo-4H-pyrido[1,2-a]pyrimidin-2-yl)methyl]sulfanyl]-3,6-bis(2,6-dimethylphenyl)-2-thioxo-2,3-dihydro[1,3]thiazolo[4,5-d]pyrimidin-7(6H)-one | -11.85                                         | 91.65                                |
| 23           | G397-0661               | N-(3-(4-cyclohexylpiperazin-1-yl)propyl)-1-(5-(2-oxopyrrolidin-1-yl)-1,3,4-thiadiazol-2-yl)piperidine-3-carboxamide                                          | -11.46                                         | 17.71                                |
| 24           | G426-0201               | 3-(3,7-dimethyl-6-oxo-1-phenyl-6,7-dihydro-1H-pyrazolo[3,4-b]pyrazin-5-yl)-N-(2-(4-methylpiperazin-1-yl)ethyl)propanamide                                    | -12.57                                         | 29.46                                |
| 25           | 5692-1397               | 4,4'-(1,1'-(1,4-phenylenebis(methylene))bis(1H-benzo[d]imidazole-2,1-diyl))bis(1,2,5-oxadiazol-3-amine)                                                      | -11.2                                          | 36.45                                |
| 26           | D308-0105               | N-(1,5-dimethyl-3-oxo-2-phenyl-2,3-dihydro-1H-pyrazol-4-yl)-2-((5,9-dimethyl-[1,2,4]triazolo[4,3-a]quinolin-1-yl)thio)acetamide                              | -12.23                                         | 28.11                                |
| 27           | C090-0497               | 4-((3-(azepan-1-yl)-6-oxo-6H-anthra[1,9-cd]isoxazol-5-yl)amino)butanoic acid                                                                                 | -11.34                                         | 82.53                                |
| 28           | K823-2046               | N-cycloheptyl-2,5-dimethyl-4-(4-(pyridin-2-yl)piperazin-1-yl)thieno[2,3-d]pyrimidine-6-carboxamide                                                           | -11.21                                         | 32.84                                |

Table S1. Cont.

| Compound No. | Chemdiv ID <sup>a</sup> | Chemical Name                                                                                                                                                      | Free Binding Energy (kcal. mol <sup>-1</sup> ) | Inhibition Activity <sup>b</sup> (%) |
|--------------|-------------------------|--------------------------------------------------------------------------------------------------------------------------------------------------------------------|------------------------------------------------|--------------------------------------|
| 29           | F575-0314               | 3-((6-(3-fluorophenyl)pyridazin-3-yl)amino)-N-(2-(piperidin-1-yl)ethyl)benzamide                                                                                   | -11.75                                         | 66.55                                |
| 30           | E017-0513               | N-(3-(4-ethylpiperazin-1-yl)propyl)-1-(5-(2-oxopyrrolidin-1-yl)-1,3,4-thiadiazol-2-yl)piperidine-3-carboxamide                                                     | -11.85                                         | 1.3                                  |
| 31           | 8016-9443               | N <sup>2</sup> ,N <sup>2</sup> -dimethyl-6-(((4-methyl-5-((2-methyl-5-nitro-1H-imidazol-1-yl)methyl)-4H-1,2,4-triazol-3-yl)thio)methyl)-1,3,5-triazine-2,4-diamine | -12.31                                         | 6.49                                 |
| 32           | 6228-1590               | N-(1-benzyl-1H-benzo[d]imidazol-2-yl)-5-((3-nitro-1H-1,2,4-triazol-1-yl)methyl)furan-2-carboxamide                                                                 | -12.39                                         | 45.55                                |
| 33           | 4486-0033               | (E)-1,4-bis((5,6-diphenyl-1,2,4-triazin-3-yl)thio)but-2-ene                                                                                                        | -12.77                                         | 40.52                                |
| 34           | 6193-0962               | 2-((4aR,5R,5aR,8aR,9S)-2,6,8-trioxo-3,10-diphenyl-2,3,4a,5,5a,6,8a,9,9a,10-decahydro-5,9-methanothiazolo[5',4':5,6]thiopyrano[2,3-f]isoindol-7(8H)-yl)acetic acid  | -10.64                                         | 39.67                                |
| 35           | K284-2326               | 3,3'-(ethane-1,2-diyl)bis(2-(((7-chloro-4-oxo-4H-pyrido[1,2-a]pyrimidin-2-yl)methyl)thio)quinazolin-4(3H)-one)                                                     | -13.42                                         | 48.66                                |
| 36           | 3952-0694               | 2-(3-fluorophenyl)-7-((2-(3-fluorophenyl)-4-oxo-4H-benzo[d][1,3]oxazin-6-yl)methyl)-4H-benzo[d][1,3]oxazin-4-one                                                   | -10.54                                         | 34.33                                |

<sup>a</sup> <http://eu.chemdiv.com>; <sup>b</sup> Inhibition activity (%) after primary inhibition assay at a 100 μM concentration of inhibitors.

Table S2. Physicochemical properties of 7 hit compounds obtained after virtual screening.

| Compounds | Chemdiv ID | Log P * | MW     | H-Donors | H-Acceptors |
|-----------|------------|---------|--------|----------|-------------|
| 2         | 6049-2540  | 4.66    | 499.17 | 1        | 8           |
| 5         | E881-0223  | 4.68    | 423.13 | 2        | 6           |
| 12        | 3011-0208  | 6.27    | 552.11 | 0        | 8           |
| 14        | G642-2349  | 4.66    | 437.14 | 1        | 6           |
| 22        | K286-0036  | 7.84    | 617.08 | 0        | 8           |
| 27        | C090-0497  | 4.23    | 419.18 | 2        | 5           |
| 29        | F575-0314  | 4.72    | 419.51 | 2        | 5           |

\* The logarithm of the ratio of the concentrations of the un-ionized solute in the solvents is called log P. The log P value is also known as a measure of lipophilicity.

**Figure S1.** Lineweaver–Burk plot to determine the NS2B-NS3<sup>pro</sup>  $K_m$  value. The reaction was conducted at various substrate concentrations to obtain the  $K_m$  value of the enzyme. Sigma plot was used to fit the kinetic data using Lineweaver–Burk double reciprocal plots.

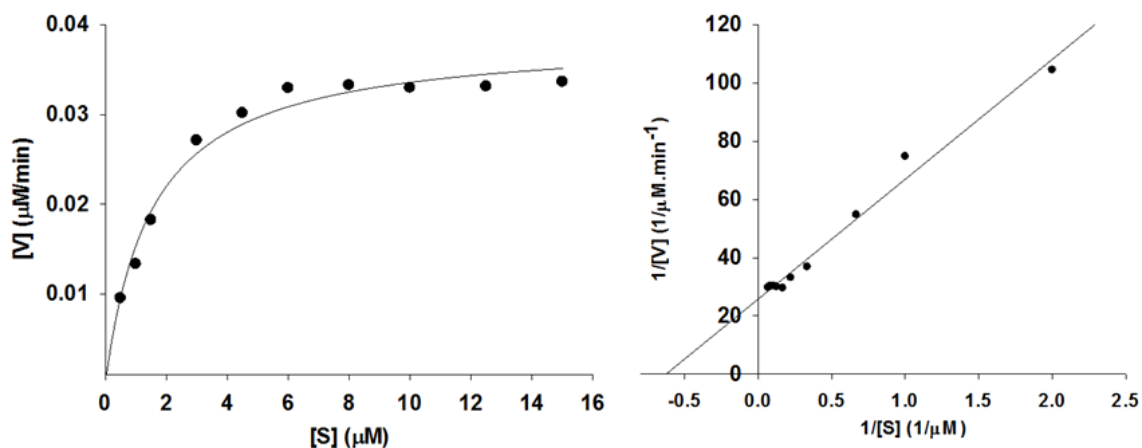

**Figure S2.** Dixon plot analyses for the inhibition of NS2B-NS3<sup>pro</sup> by compounds **2**, **14**, and **22**. The kinetic constants,  $K_i$ , were calculated using linear regression analysis. **A**, **B**, **C**: AMC peptide substrate concentration 0.75  $\mu\text{M}$  ( $\bullet$ ), 1  $\mu\text{M}$  ( $\circ$ ), 1.25  $\mu\text{M}$  ( $\blacktriangledown$ ), 1.5  $\mu\text{M}$  ( $\Delta$ ), and 1.65  $\mu\text{M}$  ( $\blacksquare$ ).

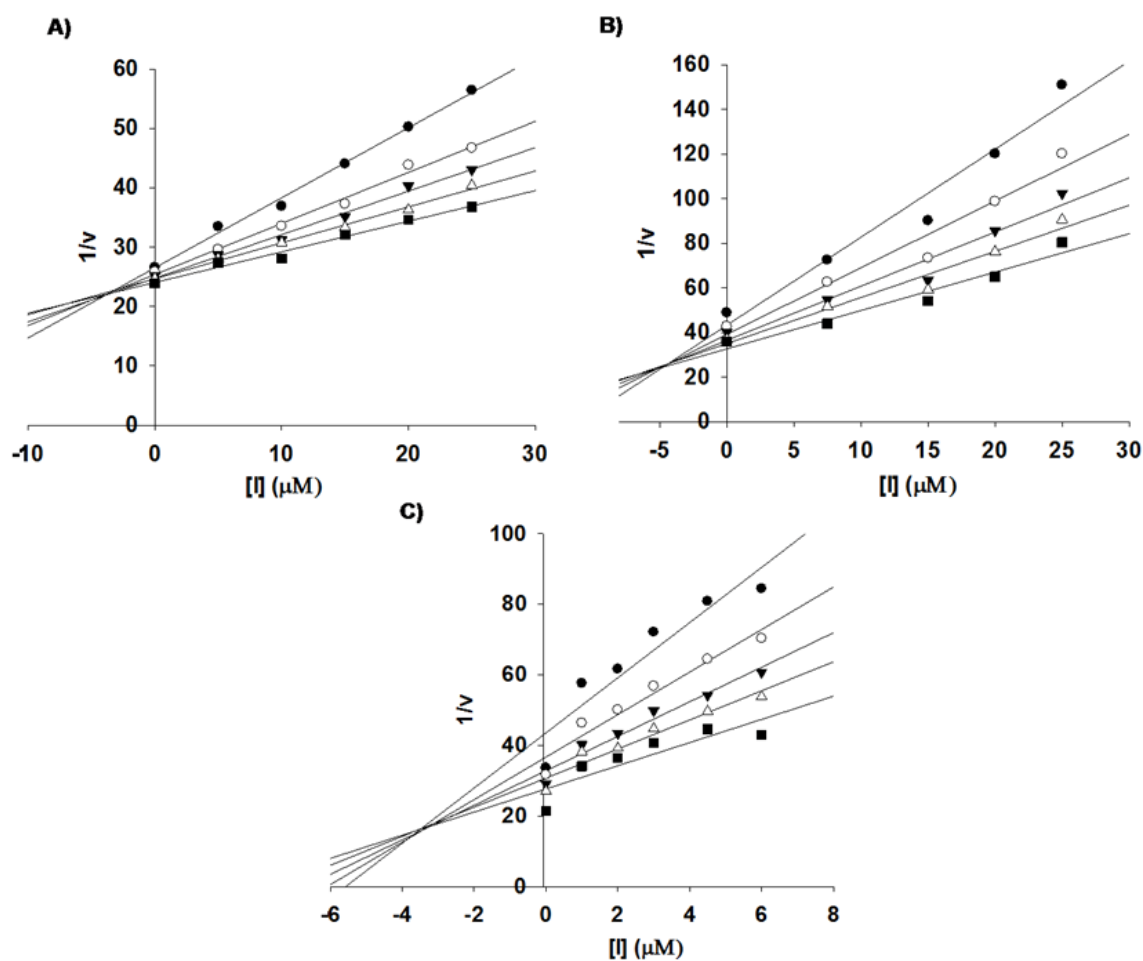

**Figure S3.** Nucleotide sequence of the NS2B-NS3<sup>pro</sup> gene. The codon optimized gene was synthesized based on the amino acid sequence of AML AAW30973.1.

```

1   GCTGATCTTAGTTTAGAAAAGGCTGCTTCTGTCCAGTGGGATGAAATGGCTGACATTACG
   A D L S L E K A A S V Q W D E M A D I T
61  GGTTTCATCCCCAATCATTTGAGGTTAAACAGGACGAAGATGGATCCTTCTCTATTAGAGAT
   G S S P I I E V K Q D E D G S F S I R D
121 GTTGAGGAAACCAACATGATAACTCTGGGTGGTGGGGGTTCCGGAGGAGGAGGGTCAGGT
   V E E T N M I T L G G G G S G G G G S G
181 GCATTATGGGACGTACCTCTCCCGCAGCCACTCAAAAAGCCACACTAAGTGAGGGTGTCTC
   A L W D V P S P A A T Q K A T L S E G V
241 TACAGGATTATGCAACGAGGCTTGTTTTGGAAAACTCAAGTCGGAGTCGGAATACACATG
   Y R I M Q R G L F G K T Q V G V G I H M
301 GAGGGAGTFTTTCACACAATGTGGCATGTAACAAGAGGTTCTGTTATCTGTTCATGAAACC
   E G V F H T M W H V T R G S V I C H E T
361 GGTCGATTGGAACCTAGTTGGGCTGATGTGAGAAATGACATGATATCTTACGGTGGTGGGA
   G R L E P S W A D V R N D M I S Y G G G
421 TGGCGTCTGGGAGATAAGTGGGACAAAAGAGGAGGACGTGCAAGTGTGGCCATTGAACCA
   W R L G D K W D K E E D V Q V L A I E P
481 GGCAAAAACCCAAAGCATGTTCAAACCAAGCCTGGACTTTTCAAGACATTGACTGGCGAG
   G K N P K H V Q T K P G L F K T L T G E
541 ATCGGTGCAGTCACACTTGACTTTAAGCCAGGTACTTCTGGATCACCTATCATTAACAAA
   I G A V T L D F K P G T S G S P I I N K
601 AAGGGCAAGGTTATAGGTCTGTACGGAAATGGTGTGTTACCAAATCTGGCGATTATGTT
   K G K V I G L Y G N G V V T K S G D Y V
661 TCCGCCATTACGCAGGCTGAACGTATCGGGGAACCTGATTATGAAGTAGATGAAGATATC
   S A I T Q A E R I G E P D Y E V D E D I
721 TTTAGAAAGAAA
   F R K K

```

**Figure S4.** <sup>1</sup>H-NMR data of compound **2** (ChemDiv Catalog number - 6049-2540). [5-((4-chloro-5-methyl-3-nitro-1*H*-pyrazol-1-yl)methyl)-*N*-(1-(2-(diethylamino)ethyl)-1*H*-benzo[*d*]imidazol-2-yl)furan-2-carboxamide].

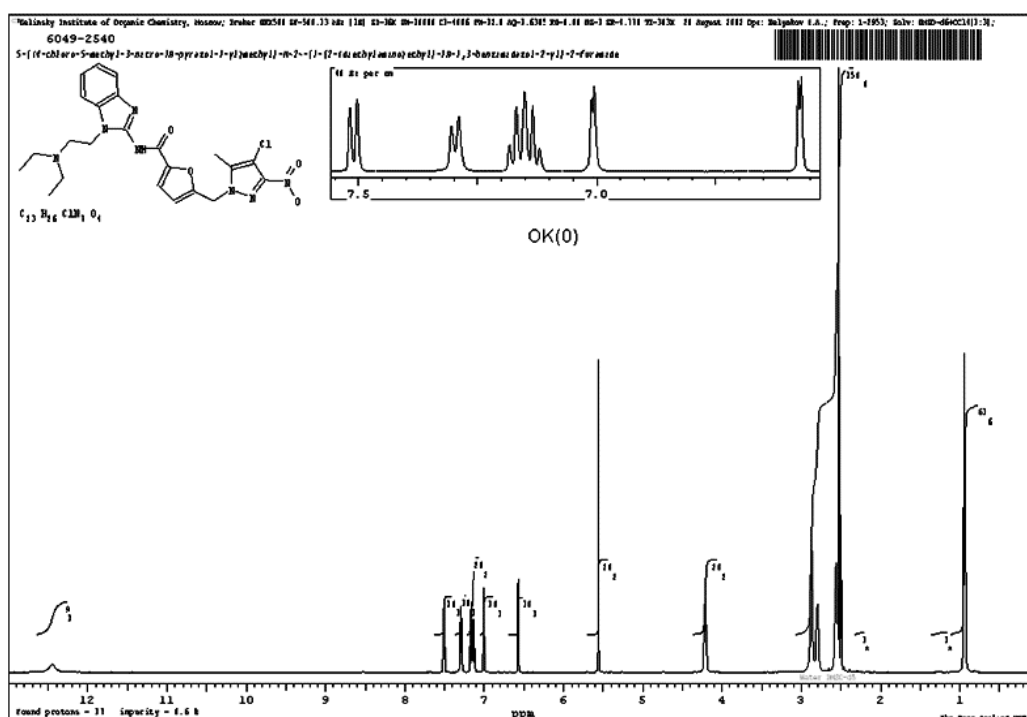

**Figure S5.**  $^1\text{H-NMR}$  of compound **5** (Chemdiv ID: E881-0223). 3-((8-benzoyl-1-methyl-[1,2,4]triazolo[4,3-a]quinoxalin-4-yl)amino)benzoic acid.

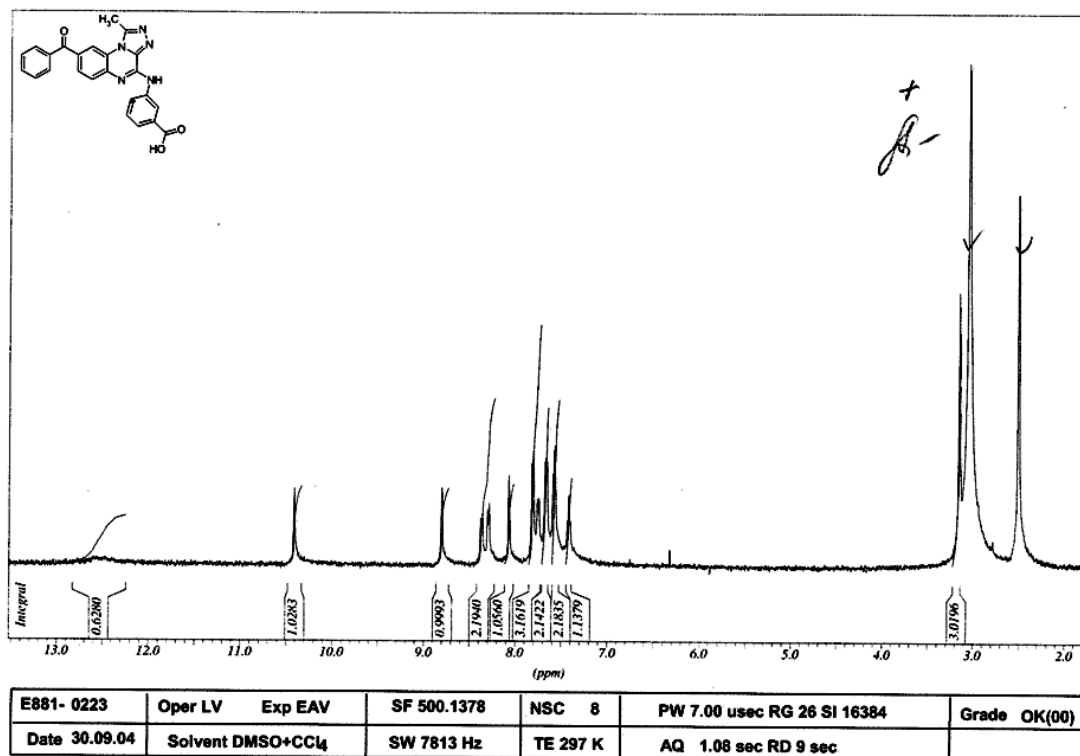

**Figure S6.**  $^1\text{H-NMR}$  of compound **12** (Chemdiv ID: 3011-0208). 2-(5-(4-fluorophenyl)-3-(thiophen-2-yl)-4,5-dihydro-1H-pyrazol-1-yl)-4-(4-(piperidin-1-ylsulfonyl)phenyl)thiazole.

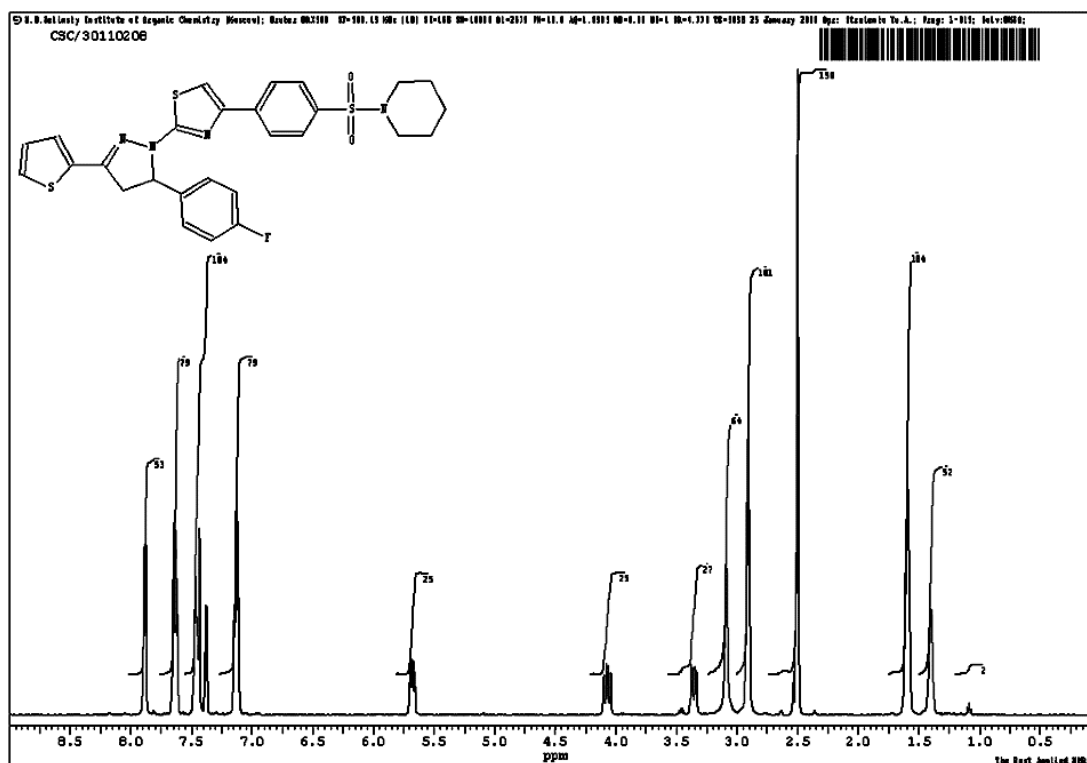

**Figure S7.** Mass spectrometry of compound **14** (Chemdiv ID: G642-2349). 4-(3-acetyl-5-(2-phenylquinolin-4-yl)-2,3-dihydro-1,3,4-oxadiazol-2-yl)benzoic acid.

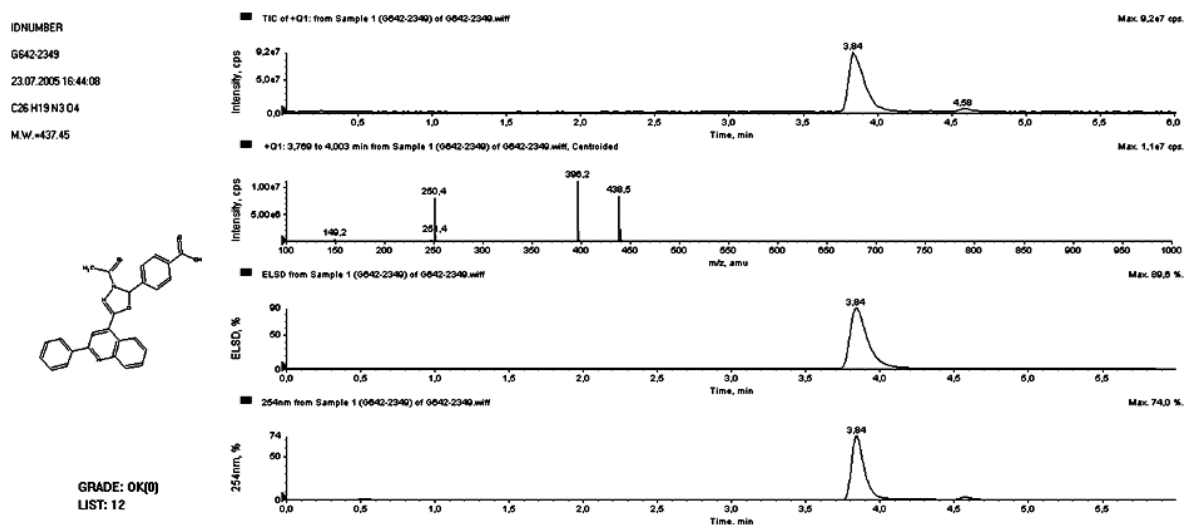

**Figure S8.**  $^1\text{H-NMR}$  of compound **22** (Chemdiv ID: K286-0036). 5-[[[7-chloro-4-oxo-4*H*-pyrido[1,2-*a*]pyrimidin-2-yl)methyl)sulfanyl]-3,6-bis(2,6-dimethylphenyl)-2-thioxo-2,3-dihydro[1,3]thiazolo[4,5-*d*]pyrimidin-7(6*H*)-one.

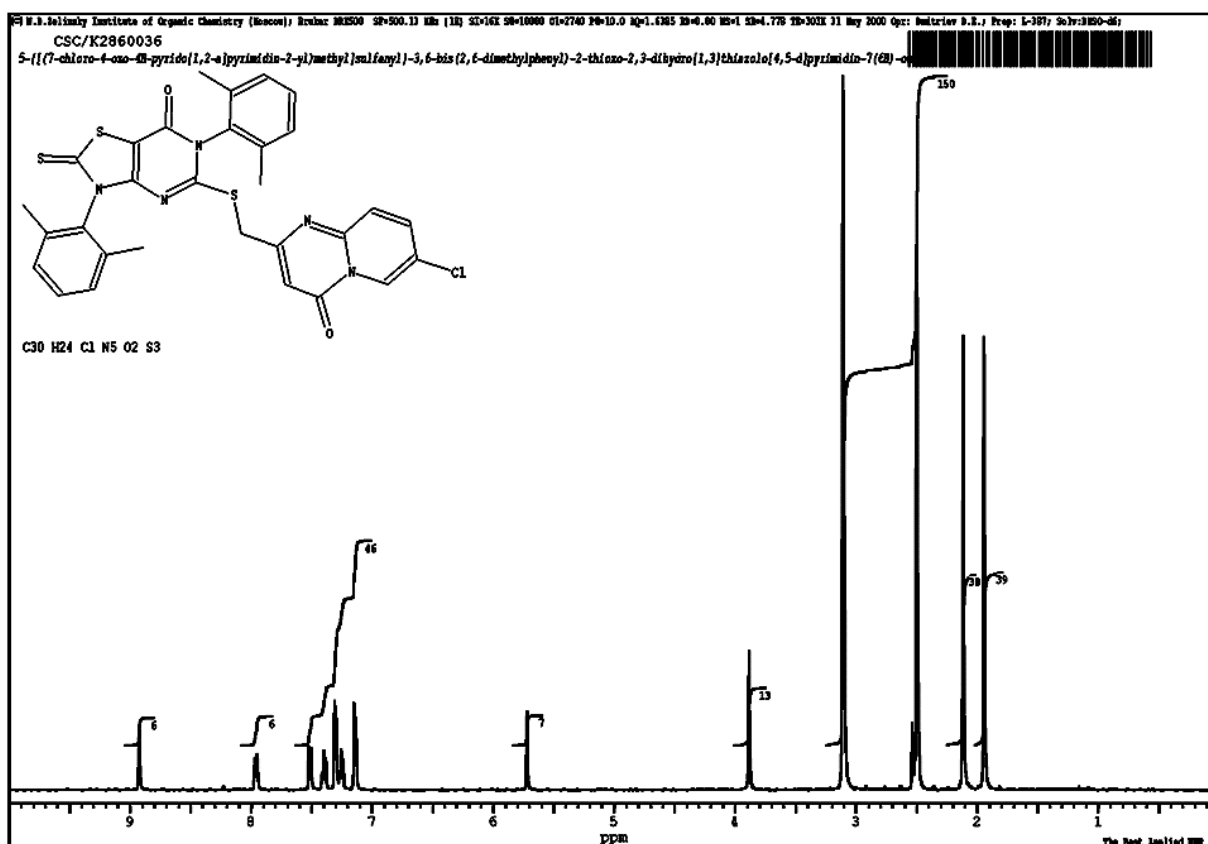

**Figure S9.**  $^1\text{H-NMR}$  of compound **27** (Chemdiv ID C090-0497). 4-((3-(azepan-1-yl)-6-oxo-6H-anthra[1,9-cd]isoxazol-5-yl)amino)butanoic acid.

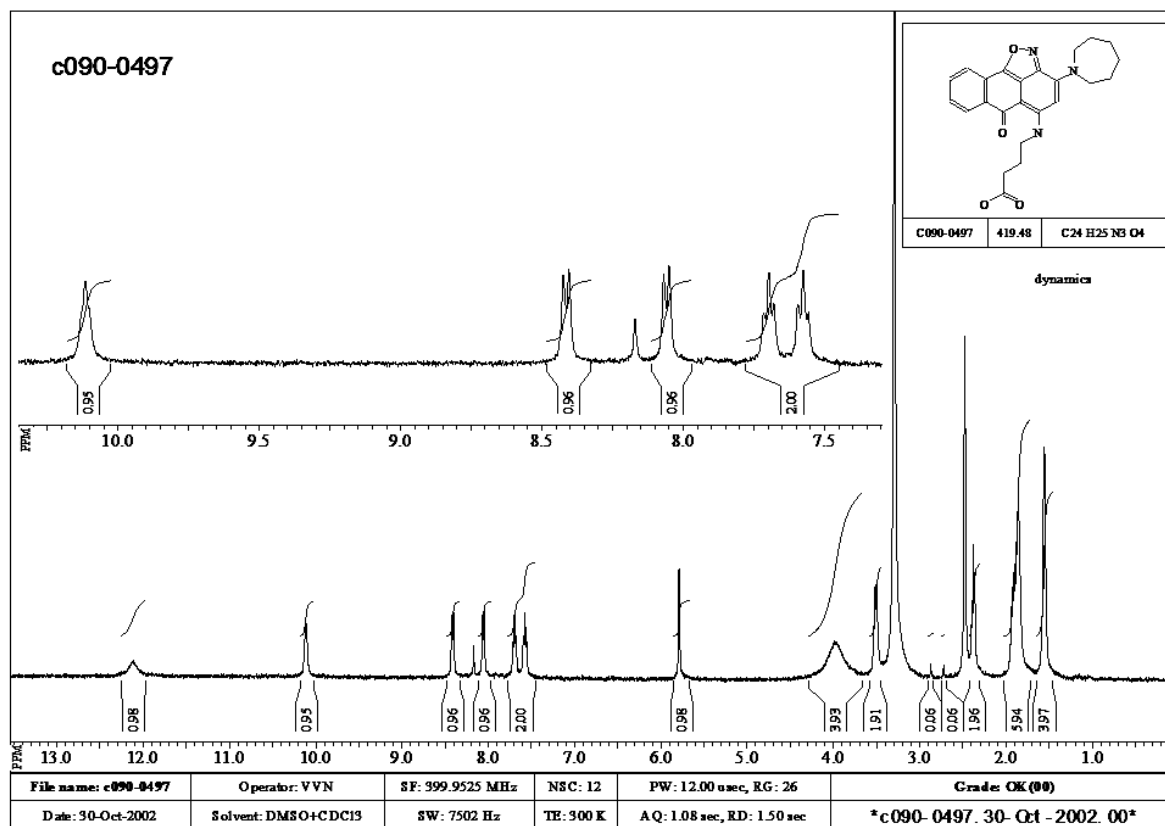

**Figure S10.**  $^1\text{H-NMR}$  of compound **29** (Chemdiv ID: F575-0314). 3-(((3-(3-fluorophenyl)pyridazin-3-yl)amino)-N-(2-(piperidin-1-yl)ethyl)benzamide.

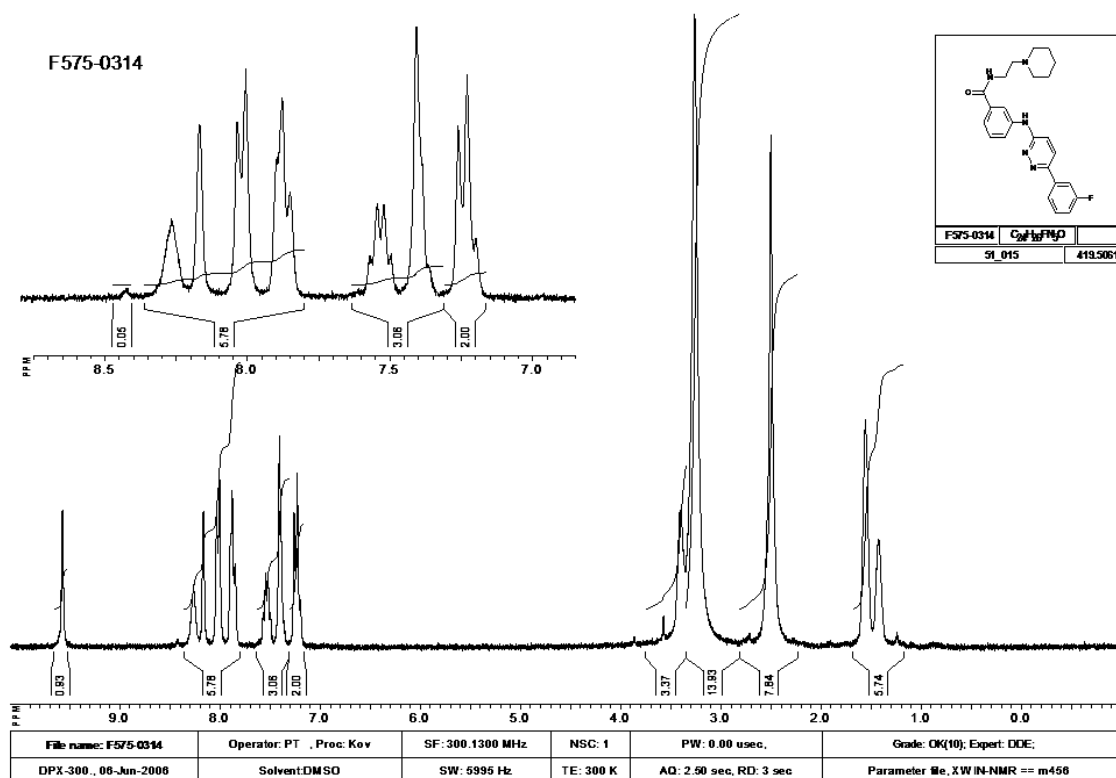

Supplement: s001 [file molecules-18-15600-s001.pdf]
